# Supplementary material for: Cohort study to evaluate prognostic factors in idiopathic pulmonary fibrosis patients introduced to oxygen therapy
Source: PubMed Central journal article supplement (PMC10444790; doi:10.1038/s41598-023-40508-8), 2023-08-22
Supplement: 41598_2023_40508_MOESM1_ESM.pdf [file 41598_2023_40508_MOESM1_ESM.pdf]

Supplementary Table 1.

## Comparison of ambulatory oxygen therapy and Long-term oxygen therapy

|                                                              | Ambulatory oxygen therapy | Long-term oxygen therapy | <i>p</i> -value |
|--------------------------------------------------------------|---------------------------|--------------------------|-----------------|
| Patients                                                     | 61 (41.5)                 | 86 (58.5)                |                 |
| Patient characteristics at initiation of oxygenation therapy |                           |                          |                 |
| Age, year                                                    | 71.5 (66.0-77.0)          | 72.0 (66.0-77.0)         | NS              |
| Sex, male                                                    | 47 (77.0)                 | 70 (81.4)                | NS              |
| FVC, % predicted                                             | 61.7 (54.2-72.4)          | 61.2 (51.3-72.2)         | NS              |
| D <sub>LCO</sub> , %predicted                                | 40.4 (32.0-53.0)          | 39.6 (32.0-51.7)         | NS              |
| Resting hypoxaemia (SpO <sub>2</sub> <88%)                   | 17 (27.9)                 | 5 (5.8)                  | 0.003           |
| P <sub>a</sub> CO <sub>2</sub> breathing air, mmHg           | 40.8 (37.7-45.0)          | 40.7 (37.6-45.2)         | NS              |
| 6MWT distance, m                                             | 300 (200-425)             | 282 (190-401)            | NS              |
| Lowest SpO <sub>2</sub> on 6MWT, %                           | 82.0 (73.5-87.0)          | 82.0 (72.0-87.0)         | NS              |
| CAT                                                          | 21.0 (16.0-27.3)          | 21.0 (15.0-27.0)         | NS              |
| mMRC scale                                                   |                           |                          | NS              |
| 0                                                            | 2 (2.3)                   | 1 (1.6)                  |                 |
| 1                                                            | 15 (17.4)                 | 3 (4.9)                  |                 |
| 2                                                            | 30 (34.9)                 | 23 (37.7)                |                 |
| 3                                                            | 30 (34.9)                 | 26 (42.6)                |                 |
| 4                                                            | 9 (10.5)                  | 8 (13.1)                 |                 |
| GAP stage                                                    |                           |                          | NS              |
| I                                                            | 15 (17.4)                 | 8 (13.1)                 |                 |
| II                                                           | 70 (81.4)                 | 49 (80.3)                |                 |
| III                                                          | 1 (1.2)                   | 4 (6.6)                  |                 |
| Outcome                                                      |                           |                          |                 |
| Median survival time, days                                   | 510 (297-1207)            | 479 (264-985)            | 0.041           |
| Death                                                        | 47                        | 64                       | NS              |
| Chronic respiratory failure                                  | 22 (46.8)                 | 36 (56.3)                |                 |
| Acute exacerbation                                           | 14 (29.8)                 | 16 (25.0)                |                 |
| Lung cancer                                                  | 1 (2.1)                   | 4 (6.3)                  |                 |
| Others                                                       | 10 (21.3)                 | 8 (12.5)                 |                 |
| Lung transplantation                                         | 1                         | 0                        |                 |

Data are presented as median (IQR) or n (%).

Abbreviations: IQR: interquartile range; FVC: forced vital capacity; D<sub>LCO</sub>: diffusion capacity of the lung for carbon monoxide; GAP: Gender-Age-Physiology; SpO<sub>2</sub>: oxygen saturation of peripheral blood; P<sub>a</sub>CO<sub>2</sub>: arterial partial pressure of carbon dioxide; 6MWT: six-minute walk test; CAT: COPD Assessment Test; mMRC: modified Medical Research Dyspnea.
